# Supplementary material for: Removal rate constants are not necessarily constant: the case of organic micropollutant removal in wastewater treatment plants
Source: Royal Society of Chemistry journal article supplement (doi:10.1039/d4ew00377b), 2024-01-01
Supplement: d4ew00377b1.pdf [file d4ew00377b1.pdf]

# 1 Supplementary information of: Removal rate constants are not necessarily 2 constant: the case of organic micropollutant removal in sewage treatment 3 plants

4 Tamara J.H.M. van Bergen<sup>1,2\*</sup>, A.M. Schipper<sup>1,3</sup>, D. Mooij<sup>1</sup>, A.M.J. Ragas<sup>1</sup>, M.W. Kuiper<sup>4</sup>, A.J. Hendriks<sup>1</sup>,  
5 M.A.J. Huijbregts<sup>1</sup>, R. van Zelm\*

6 <sup>1</sup> Department of Environmental Science, Radboud Institute for Biology and Environmental Science,  
7 Radboud University, Nijmegen, The Netherlands

8 <sup>2</sup> National Institute for Public Health and the Environment, Bilthoven, The Netherlands

9 <sup>3</sup> PBL Netherlands Environmental Assessment Agency, The Hague, the Netherlands

10 <sup>4</sup> Waterschap Drents Overijsselse Delta, Zwolle, The Netherlands

11 \* Corresponding author

12

## 13 SI 1. Michaelis-Menten theory and (pseudo) first order rate constants

14 According to Michaelis-Menten, the reaction speed is dependent on substrate concentration and is  
15 calculated according to equation S1:

$$16 \quad V = \frac{V_{max} \cdot [S]}{[S] + K_m} \quad \text{(Equation S1)}$$

17 where V is the reaction rate (mol L<sup>-1</sup> h<sup>-1</sup>), V<sub>max</sub> is the maximum reaction rate (mol L<sup>-1</sup> h<sup>-1</sup>), [S] is the  
18 substrate concentration (mol L<sup>-1</sup>), and K<sub>m</sub> is the substrate concentration where V is half of V<sub>max</sub> (mol L<sup>-1</sup>).

19 When studying OMPs in very low concentrations (ng/L - µg/L), it is assumed that the substrate  
20 concentration is far below (Figure S1A, grey box k<sub>m</sub> < 1). In this case, the reaction rate is not decreasing  
21 with increasing substrate, but instead the reaction rate depends linearly on the substrate concentration.

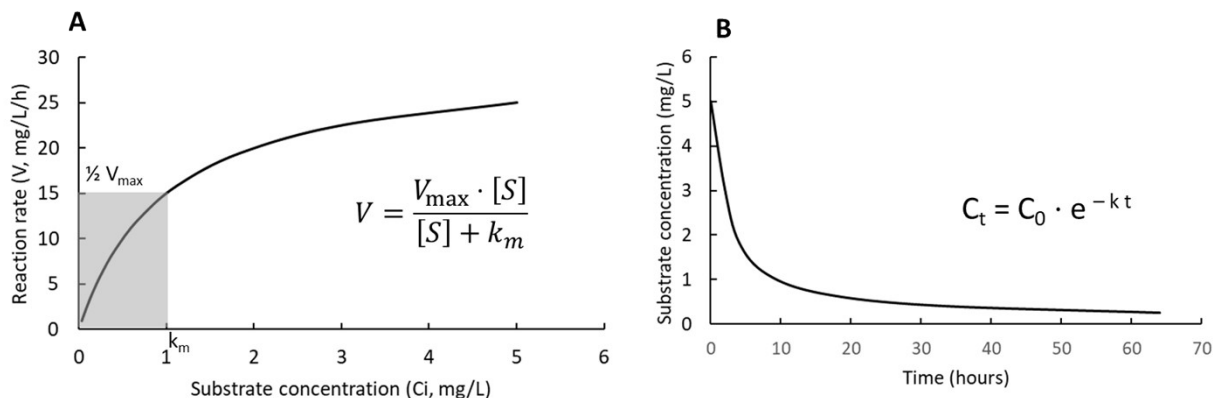

23 **Figure S1.** A) Michaelis-Menten theory; B) pseudo-first order kinetics.

24 When the reaction rate depends linearly on the substrate concentration,  $k$  can be calculated from a  
25 decrease in concentration over time via pseudo-first order biotransformation kinetics (equation 2, figure  
26 1B, Schwarzenbach et al. 2005, Simkins and Alexander 1984):

$$27 C_t = C_0 * e^{-k t} \quad \text{(equation S2)}$$

28 where  $C_t$  is the concentration at time  $t$  ( $\text{mol L}^{-1}$ ),  $C_0$  is the concentration at time 0 ( $\text{mol L}^{-1}$ ), and  $k$  is the  
29 rate constant ( $\text{h}^{-1}$ ).

30 **Table S1.** VIF values for each variable after excluding collinear variables (in case VIF > 3).

| variable          | VIF |
|-------------------|-----|
| $\log K_{ow}$     | 1.9 |
| $\text{pK}_a$     | 1.2 |
| $\log \text{HBA}$ | 2.2 |
| $v$               | 1.8 |
| $E_{LUMO}$        | 1.9 |
| $\Delta E_{L-H}$  | 1.6 |
| $H_f$             | 1.7 |
| $\log C_i$        | 1.9 |
| $\log \text{SRT}$ | 1.4 |
| $\log Q$          | 1.5 |
| $T$               | 1.1 |
| $\text{pH}$       | 1.2 |
| $\text{HRT}$      | 1.8 |

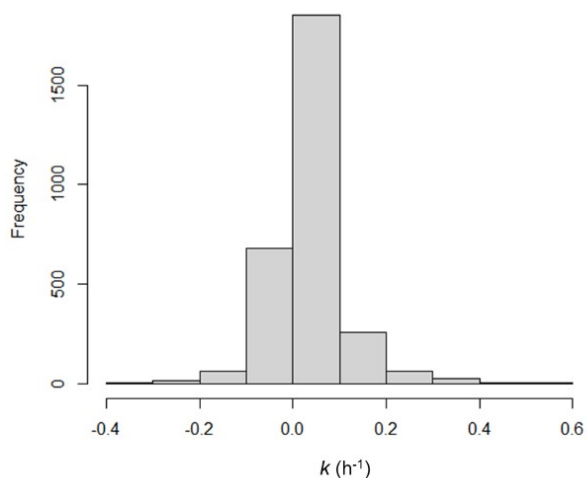

31

32 **Figure S2.** Histogram of removal rate constants  $k$  ( $\text{h}^{-1}$ ) and the frequency of values.

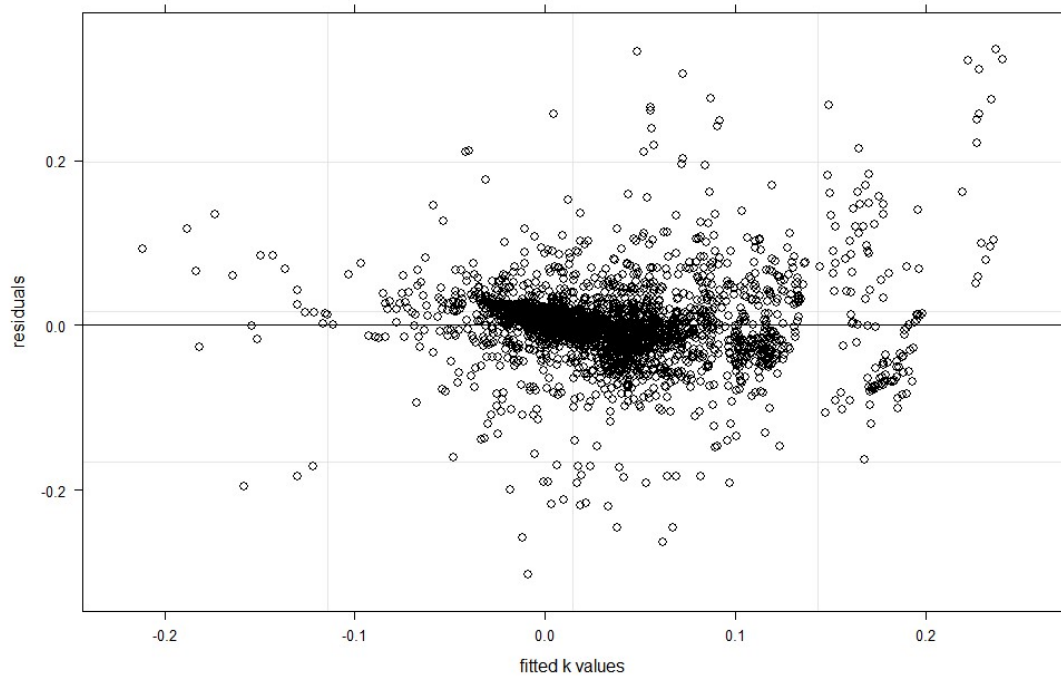

33

34 **Figure S3.** Residuals plotted against modelled k values.

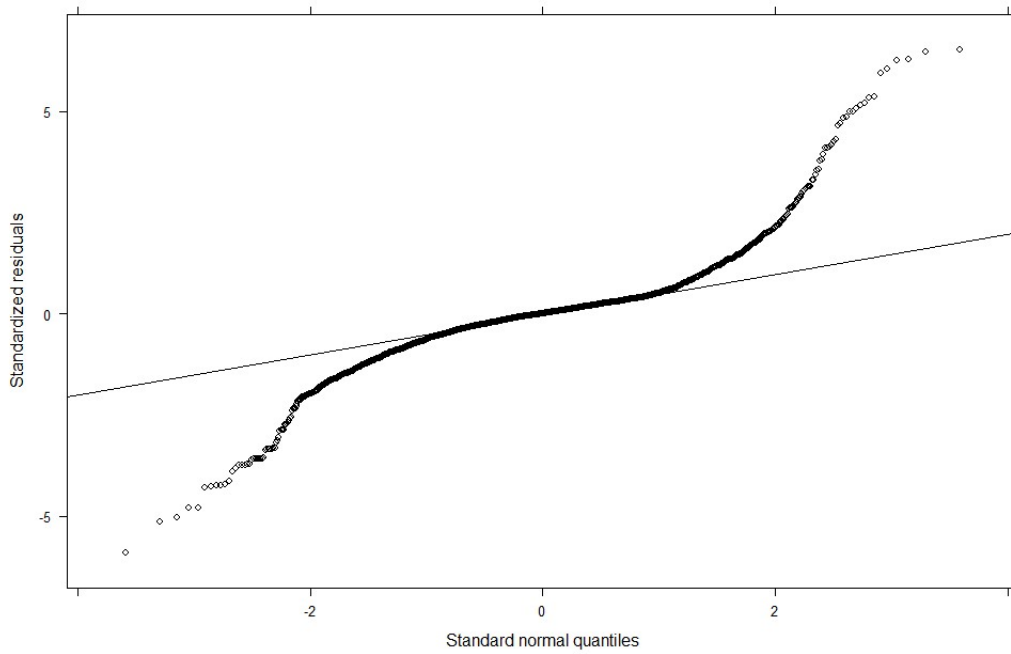

35

36 **Figure S4.** Standardized residuals plotted against standard normal quantiles.

37

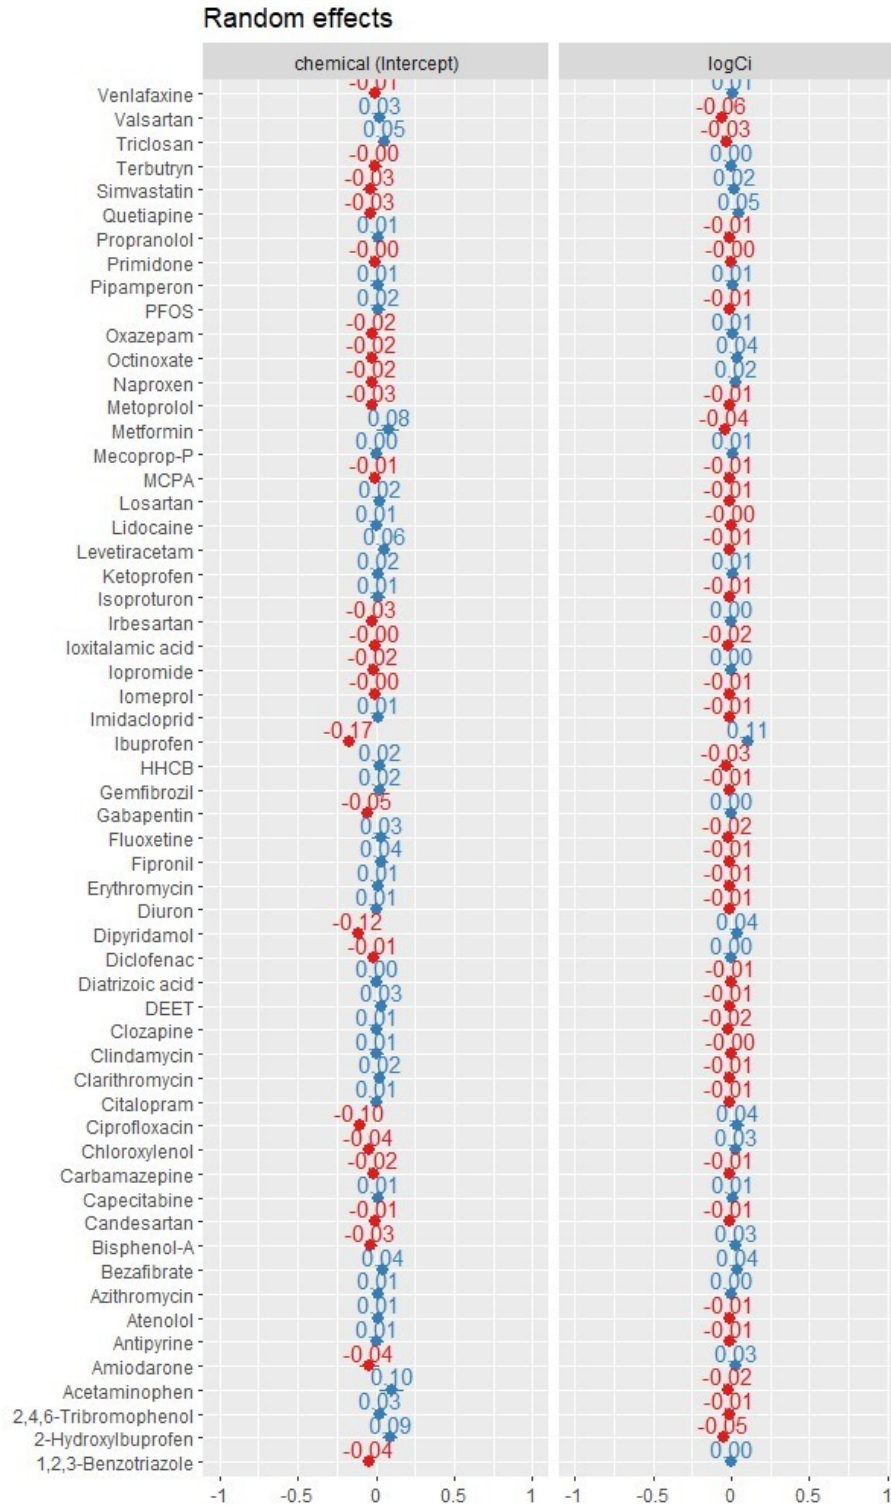

38

39 **Figure S5.** Deviations of intercept (left) and slope (right) from the overall model (equation 4), caused by  
 40 random effect OMP. This affects the relationship between influent concentration and  $k$  for each OMP.  
 41 Red dots represent a negative intercept or slope, while dots represent a positive intercept or slope.

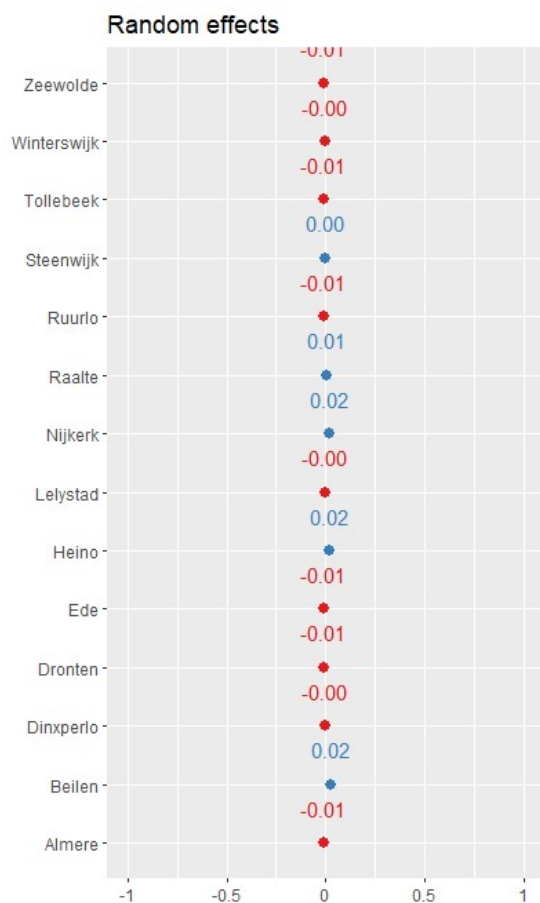

42

43 **Figure S6.** Deviations of intercept from overall model (equation 4) by random effect WWTP. Red dots  
 44 represent a negative intercept, while dots represent a positive intercept.

45 **Table S2.** Mode of action (MoA) per OMP, number of observations (n), minimum and maximum influent  
 46 concentration ( $C_i$ ) in wastewater ( $\mu\text{mol L}^{-1}$ ), and the intercept and slope of the relationship between  $C_i$   
 47 and  $k$  per OMP. We collected MoAs primarily via a dataset reported by Posthuma et al. (2019),  
 48 supplemented with other literature studies. Abbreviations: AAA = Analgesics, Anti-inflammatory Drugs  
 49 and Antipyretics; ARB = angiotensin II receptor blocker, Cardiovasc. drugs = cardiovascular drugs;  
 50 Psychoth. Drugs = physiotherapeutic drugs; Phosph. inhibitor = Phosphodiesterase inhibitor; NA  
 51 includes OMPs for which no MoA was available.

| OMP                  | Mode of action                                             | n  | min   | max   | intercept | slope |
|----------------------|------------------------------------------------------------|----|-------|-------|-----------|-------|
| 1,2,3-Benzotriazole  | NA                                                         | 78 | 0.010 | 0.193 | -0.008    | 0.045 |
| 2,4,6-Tribromophenol | Narcosis                                                   | 3  | 0.001 | 0.002 | 0.062     | 0.031 |
| 2-Hydroxylbuprofen   | NA                                                         | 77 | 0.016 | 0.265 | 0.126     | 0.005 |
| Acetaminophen        | Analgesics, Anti-inflammatory Drugs and Antipyretics (AAA) | 77 | 0.549 | 4.895 | 0.138     | 0.021 |
| Amiodarone           | Class III antiarrhythmic                                   | 1  | 0.000 | 0.000 | -0.006    | 0.074 |
| Antipyrine           | Analgesics, Anti-                                          | 3  | 0.000 | 0.002 | 0.043     | 0.037 |

|                  | inflammatory Drugs and Antipyretics (AAA)                  |     |       |       |        |       |
|------------------|------------------------------------------------------------|-----|-------|-------|--------|-------|
| Atenolol         | Cardiovascular Drugs                                       | 78  | 0.000 | 0.005 | 0.050  | 0.039 |
| Azithromycin     | Bactericides                                               | 74  | 0.000 | 0.003 | 0.048  | 0.047 |
| Bezafibrate      | Cardiovascular Drugs                                       | 56  | 0.000 | 0.002 | 0.077  | 0.082 |
| Bisphenol-A      | Narcosis                                                   | 19  | 0.009 | 0.307 | 0.006  | 0.071 |
| Candesartan      | Angiotensin II receptor blocker (ARB)                      | 58  | 0.000 | 0.001 | 0.028  | 0.030 |
| Capecitabine     | Nucleoside metabolic inhibitor                             | 42  | 0.000 | 0.002 | 0.048  | 0.054 |
| Carbamazepine    | Anticonsulvant                                             | 83  | 0.001 | 0.005 | 0.016  | 0.034 |
| Chloroxylonol    | Narcosis                                                   | 75  | 0.001 | 0.070 | -0.006 | 0.077 |
| Ciprofloxacin    | Bactericides                                               | 9   | 0.003 | 0.006 | -0.064 | 0.083 |
| Citalopram       | Psychotherapeutic drugs                                    | 74  | 0.000 | 0.001 | 0.040  | 0.037 |
| Clarithromycin   | Bactericides                                               | 76  | 0.000 | 0.001 | 0.056  | 0.035 |
| Clindamycin      | Bactericides                                               | 7   | 0.000 | 0.000 | 0.043  | 0.040 |
| Clozapine        | Psychotherapeutic drugs                                    | 49  | 0.000 | 0.001 | 0.042  | 0.028 |
| DEET             | Insect repellents                                          | 78  | 0.001 | 0.094 | 0.067  | 0.035 |
| Diatrizoic acid  | Contrast media                                             | 6   | 0.000 | 0.002 | 0.040  | 0.040 |
| Diclofenac       | Analgesics, Anti-inflammatory Drugs and Antipyretics (AAA) | 79  | 0.001 | 0.006 | 0.024  | 0.047 |
| Dipyridamol      | Phosphodiesterase inhibitor                                | 59  | 0.003 | 0.030 | -0.080 | 0.083 |
| Diuron           | Phenylurea                                                 | 7   | 0.000 | 0.004 | 0.042  | 0.038 |
| Erythromycin     | Bactericides                                               | 49  | 0.000 | 0.002 | 0.047  | 0.034 |
| Fipronil         | Pyrazole                                                   | 78  | 0.000 | 0.000 | 0.071  | 0.034 |
| Fluoxetine       | Psychotherapeutic drugs                                    | 1   | 0.000 | 0.000 | 0.067  | 0.025 |
| Gabapentin       | Anticonsulvant                                             | 78  | 0.006 | 0.099 | -0.014 | 0.047 |
| Gemfibrozil      | Cardiovascular Drugs                                       | 72  | 0.000 | 0.010 | 0.056  | 0.034 |
| HHCB             | NA                                                         | 78  | 0.005 | 0.026 | 0.059  | 0.013 |
| Ibuprofen        | Analgesics, Anti-inflammatory Drugs and Antipyretics (AAA) | 154 | 0.011 | 0.451 | -0.133 | 0.154 |
| Imidacloprid     | Neurotoxicant                                              | 38  | 0.000 | 0.001 | 0.047  | 0.032 |
| Iomeprol         | Contrast media                                             | 59  | 0.001 | 0.129 | 0.035  | 0.031 |
| Iopromide        | Contrast media                                             | 35  | 0.000 | 0.042 | 0.018  | 0.048 |
| Ioxitalamic acid | Contrast media                                             | 54  | 0.000 | 0.009 | 0.031  | 0.024 |
| Irbesartan       | angiotensin II receptor blocker (ARB)                      | 78  | 0.001 | 0.010 | 0.009  | 0.046 |
| Isoproturon      | Phenylurea                                                 | 3   | 0.000 | 0.001 | 0.050  | 0.035 |
| Ketoprofen       | Analgesics, Anti-inflammatory Drugs and Antipyretics (AAA) | 42  | 0.000 | 0.002 | 0.054  | 0.051 |
| Levetiracetam    | Antiepiletics                                              | 72  | 0.008 | 0.100 | 0.091  | 0.037 |

|             |                                                            |    |       |       |       |       |
|-------------|------------------------------------------------------------|----|-------|-------|-------|-------|
| Lidocaine   | local anesthetic                                           | 53 | 0.000 | 0.002 | 0.041 | 0.040 |
| Losartan    | angiotensin II receptor blocker (ARB)                      | 78 | 0.001 | 0.007 | 0.060 | 0.037 |
| MCPA        | Phenoxyacetic                                              | 15 | 0.000 | 0.009 | 0.027 | 0.038 |
| Mecoprop-P  | Phenoxypropanoic                                           | 14 | 0.000 | 0.002 | 0.038 | 0.056 |
| Metformin   | Antidiabetics                                              | 78 | 0.178 | 1.936 | 0.113 | 0.009 |
| Metoprolol  | Cardiovascular Drugs                                       | 78 | 0.001 | 0.024 | 0.006 | 0.034 |
| Naproxen    | Analgesics, Anti-inflammatory Drugs and Antipyretics (AAA) | 78 | 0.009 | 0.078 | 0.010 | 0.069 |
| Octinoxate  | UV filter                                                  | 77 | 0.002 | 0.083 | 0.010 | 0.084 |
| Oxazepam    | Psychotherapeutic drugs                                    | 78 | 0.001 | 0.007 | 0.015 | 0.052 |
| PFOS        | Surfactant                                                 | 6  | 0.000 | 0.001 | 0.053 | 0.034 |
| Pipamperon  | Psychotherapeutic drugs                                    | 13 | 0.000 | 0.000 | 0.048 | 0.054 |
| Primidone   | Anticonvulsant                                             | 10 | 0.000 | 0.000 | 0.034 | 0.043 |
| Propranolol | Cardiovascular Drugs                                       | 72 | 0.000 | 0.001 | 0.048 | 0.032 |
| Quetiapine  | Psychotherapeutic drugs                                    | 28 | 0.000 | 0.001 | 0.002 | 0.095 |
| Simvastatin | HMG-CoA reductase inhibitors                               | 3  | 0.000 | 0.001 | 0.003 | 0.063 |
| Terbutryn   | Narcosis                                                   | 3  | 0.000 | 0.001 | 0.035 | 0.048 |
| Triclosan   | Narcosis                                                   | 61 | 0.001 | 0.008 | 0.086 | 0.019 |
| Valsartan   | angiotensin II receptor blocker (ARB)                      | 78 | 0.001 | 0.046 | 0.060 | 0.011 |
| Venlafaxine | Psychotherapeutic drugs                                    | 78 | 0.000 | 0.002 | 0.030 | 0.050 |

52

53 **Table S3.** Recent studies of biofilm reactors and bottle incubations that reported an effect of  
54 concentration (C) on the removal rate constant (k), removal rate/percentage or removal efficiency (RE)  
55 of OMPs.

| study               | system  | sample                | Spiking concentration range (order of magnitude) | OMPs                    | Concentration relationship                                                                                                     |
|---------------------|---------|-----------------------|--------------------------------------------------|-------------------------|--------------------------------------------------------------------------------------------------------------------------------|
| Wang et al. (2020)  | WWTPs   | Influent and effluent | -                                                | 169 OMPs                | Positive relationships between concentration and RE for clusters of OMPs, a negative relationship for the trimethoprim cluster |
| Nolte et al. (2020) | WWTPs   | Influent and effluent | -                                                | 28 OMPs                 | OMPs with a higher C also had a higher k                                                                                       |
| Rios-Miguel et      | Reactor | Activated sludge      | 10 <sup>0</sup> - 10 <sup>2</sup>                | diclofenac, metoprolol, | C proportionally increased the removal rate of each                                                                            |

|                          |                            |                                                   |                                  |                                                                                                                    |                                                                                              |
|--------------------------|----------------------------|---------------------------------------------------|----------------------------------|--------------------------------------------------------------------------------------------------------------------|----------------------------------------------------------------------------------------------|
| al. (2021)               |                            | from reaeration tank of the WWTP                  |                                  | metformin, carbamazepine and fluoxetine                                                                            | compound; removal percentage and C were not correlated                                       |
| van Bergen et al. (2021) | Bottle incubation          | Activated sludge from reaeration tank of the WWTP | $0-10^2 \mu\text{g L}^{-1}$      | Metformin & Metoprolol                                                                                             | Increase in $k$ with increase in C                                                           |
| Svendsen et al. (2020)   | Moving bed biofilm reactor | WWTP effluent                                     | $0-10^2 \mu\text{g L}^{-1}$      | Citalopram, metoprolol, sulfamethizole, ac-sulfadiazine, clarithromycin, iohexol, iopromide, iomeprol              | $k$ initially increased; C > environmentally relevant concentration decreased                |
|                          |                            |                                                   | $0-10^2 \mu\text{g L}^{-1}$      | Ibuprofen, sotalol, trimethoprim, erythromycin, atenolol, diclofenac                                               | Decrease in $k$ with decrease in C                                                           |
| Birch et al. (2021)      | Bottle incubation          | WWTP effluent                                     | $10^2 - 10^4 \mu\text{g L}^{-1}$ | linalool                                                                                                           | $k$ was highest at intermediate C                                                            |
|                          |                            |                                                   | $10^2 - 10^4 \mu\text{g L}^{-1}$ | Geraniol, citronellol, 4-tert-butylcyclohexyl acetate, 2-ethylhexyl-4-methoxycinnamate, tert-butyl-4-methoxyphenol | Decrease in $k$ with increase in C                                                           |
|                          |                            |                                                   | $10^2 - 10^4 \mu\text{g L}^{-1}$ | $\alpha$ -isomethylionone                                                                                          | Decrease in $k$ with increase in C, but $k$ was lower at highest C than at second-highest C. |
|                          |                            |                                                   | $10^2 - 10^4 \mu\text{g L}^{-1}$ | naphthalene                                                                                                        | Increase in $k$ with increase in C                                                           |
|                          |                            |                                                   | $10^2 - 10^4 \mu\text{g L}^{-1}$ | phenanthrene                                                                                                       | $k$ was highest at intermediate C                                                            |
| Wei et al. (2019)        | Bottle incubation          | Activated sludge from reaeration tank of the WWTP | $10^3 - 10^5 \mu\text{g L}^{-1}$ | Metronidazole, bezafibrate, ibuprofen, sulfamethoxazole                                                            | Decrease in $k$ with increase in C                                                           |



58 **Table S4.** Best fitted models (AIC delta < 2), fitted with dredge (MuMIn), and the corresponding AIC  
 59 value, calculated based on maximum likelihood.

| Model structure                                                                                                                                               | AIC     |
|---------------------------------------------------------------------------------------------------------------------------------------------------------------|---------|
| $k = 0.035 - 0.017 \text{ HRT} + 0.044 \log C_i + (\log C_i   \text{OMP}) + (1   \text{WWTP})$                                                                | -8892.6 |
| $k = 0.035 - 0.017 \text{ HRT} + 0.044 \log C_i + 0.001 T_i + (\log C_i   \text{OMP}) + (1   \text{WWTP})$                                                    | -8892.5 |
| $k = 0.035 - 0.018 \text{ HRT} + 0.044 \log C_i - 0.003 \log Q + (\log C_i   \text{OMP}) + (1   \text{WWTP})$                                                 | -8891.8 |
| $k = 0.034 - 0.018 \text{ HRT} + 0.044 \log C_i - 0.003 \log Q + 0.001 T_i + (\log C_i   \text{OMP}) + (1   \text{WWTP})$                                     | -8891.8 |
| $k = 0.034 - 0.011 H_f - 0.016 \text{ HRT} + 0.044 \log C_i - 0.011 \log \text{HBA} + 0.002 T_i + (\log C_i   \text{chemical}) + (1   \text{wwtp})$           | -8891.6 |
| $k = 0.034 - 0.011 H_f - 0.016 \text{ HRT} + 0.045 \log C_i - 0.01 \log \text{HBA} + (\log C_i   \text{OMP}) + (1   \text{WWTP})$                             | -8891.5 |
| $k = 0.034 - 0.005 H_f - 0.016 \text{ HRT} + 0.044 \log C_i + (\log C_i   \text{OMP}) + (1   \text{WWTP})$                                                    | -8891.3 |
| $k = 0.034 - 0.006 H_f - 0.016 \text{ HRT} + 0.044 \log C_i + 0.001 T_i + (\log C_i   \text{chemical}) + (1   \text{wwtp})$                                   | -8891.3 |
| $k = 0.035 - 0.017 \text{ HRT} + 0.045 \log C_i - 0.005 \log \text{HBA} + (\log C_i   \text{OMP}) + (1   \text{WWTP})$                                        | -8891.2 |
| $k = 0.035 - 0.016 \text{ HRT} + 0.044 \log C_i - 0.005 \log \text{HBA} + 0.001 T_i + (\log C_i   \text{OMP}) + (1   \text{WWTP})$                            | -8891.2 |
| $k = 0.035 - 0.017 \text{ HRT} + 0.044 \log C_i - 0.004 v + (\log C_i   \text{OMP}) + (1   \text{WWTP})$                                                      | -8891.1 |
| $k = 0.035 - 0.016 \text{ HRT} + 0.044 \log C_i + 0.001 T_i - 0.004 v + (\log C_i   \text{OMP}) + (1   \text{WWTP})$                                          | -8891.1 |
| $k = 0.035 - 0.005 \text{ pKa} - 0.017 \text{ HRT} + 0.044 \log C_i + (\log C_i   \text{OMP}) + (1   \text{WWTP})$                                            | -8891.1 |
| $k = 0.035 - 0.005 \text{ pKa} - 0.016 \text{ HRT} + 0.044 \log C_i + 0.001 T_i + (\log C_i   \text{OMP}) + (1   \text{WWTP})$                                | -8891.1 |
| $k = 0.034 - 0.011 H_f - 0.018 \text{ HRT} + 0.044 \log C_i - 0.011 \log \text{HBA} - 0.003 \log Q + 0.002 T_i + (\log C_i   \text{OMP}) + (1   \text{WWTP})$ | -8890.8 |
| $k = 0.035 + 0.003 \Delta E_{L-H} - 0.017 \text{ HRT} + 0.045 \log C_i + (\log C_i   \text{OMP}) + (1   \text{WWTP})$                                         | -8890.8 |
| $k = 0.035 - 0.016 \text{ HRT} + 0.045 \log C_i - 0.002 \log \text{SRT} + (\log C_i   \text{OMP}) + (1   \text{WWTP})$                                        | -8890.8 |
| $k = 0.035 + 0.002 \Delta E_{L-H} - 0.016 \text{ HRT} + 0.044 \log C_i + 0.001 T_i + (\log C_i   \text{OMP}) + (1   \text{WWTP})$                             | -8890.8 |
| $k = 0.034 - 0.01 H_f - 0.018 \text{ HRT} + 0.044 \log C_i - 0.011 \log \text{HBA} - 0.003 \log Q + (\log C_i   \text{OMP}) + (1   \text{WWTP})$              | -8890.7 |
| $k = 0.035 - 0.016 \text{ HRT} + 0.044 \log C_i - 0.002 \log \text{SRT} + 0.001 T_i + (\log C_i   \text{OMP}) + (1   \text{WWTP})$                            | -8890.7 |
| $k = 0.035 - 0.017 \text{ HRT} + 0.045 \log C_i + 0.002 \log K_{ow} + (\log C_i   \text{OMP}) + (1   \text{WWTP})$                                            | -8890.7 |
| $k = 0.035 - 0.016 \text{ HRT} + 0.044 \log C_i + 0.002 \log K_{ow} + 0.001 T_i + (\log C_i   \text{OMP}) + (1   \text{WWTP})$                                | -8890.6 |
| $k = 0.035 - 0.017 \text{ HRT} + 0.045 \log C_i - 0.0003 \text{pH} + (\log C_i   \text{OMP}) + (1   \text{WWTP})$                                             | -8890.6 |
| $k = 0.035 - 0.016 \text{ HRT} + 0.044 \log C_i + 0.0004 \text{pH} + 0.002 T_i + (\log C_i   \text{OMP}) + (1   \text{WWTP})$                                 | -8890.6 |
| $k = 0.035 + 9.2 \cdot 10^{-6} E_{lumo} - 0.017 \text{ HRT} + 0.045 \log C_i + (\log C_i   \text{OMP}) + (1   \text{WWTP})$                                   | -8890.6 |

60

61

## 62 References

- 63 Birch, H., Sjøholm, K.K., Dechesne, A., Sparham, C., van Egmond, R. and Mayer, P. (2021) Biodegradation  
64 Kinetics of Fragrances, Plasticizers, UV Filters, and PAHs in a Mixture– Changing Test Concentrations over  
65 5 Orders of Magnitude. *Environmental Science & Technology* 56(1), 293-301. DOI:  
66 10.1021/acs.est.1c05583.
- 67 Nolte, T.M., Chen, G., van Schayk, C.S., Pinto-Gil, K., Hendriks, A.J., Peijnenburg, W.J.G.M. and Ragas,  
68 A.M.J. (2020) Disentanglement of the chemical, physical, and biological processes aids the development  
69 of quantitative structure-biodegradation relationships for aerobic wastewater treatment. *Science of The*  
70 *Total Environment* 708, 133863. DOI: 10.1016/j.scitotenv.2019.133863.
- 71 Posthuma, L., van Gils, J., Zijp, M.C., van De Meent, D. and de Zwart, D. (2019) Species sensitivity  
72 distributions for use in environmental protection, assessment, and management of aquatic ecosystems  
73 for 12 386 chemicals. *Environmental Toxicology and Chemistry* 38(4), 905-917.
- 74 Rios-Miguel, A.B., Jetten, M.S.M. and Welte, C.U. (2021) Effect of concentration and hydraulic reaction  
75 time on the removal of pharmaceutical compounds in a membrane bioreactor inoculated with activated  
76 sludge. *Microb Biotechnol* 14(4), 1707-1721. DOI: 10.1111/1751-7915.13837.
- 77 Schwarzenbach, R., Gschwend, P. and Imboden, D. (2005) pp. 387-458. *Environmental organic chemistry,*  
78 *USA. Wiley.*
- 79 Simkins, S. and Alexander, M. (1984) Models for mineralization kinetics with the variables of substrate  
80 concentration and population density. *Applied and Environmental Microbiology* 47(6), 1299-1306.
- 81 Svendsen, S.B., El-Taliawy, H., Carvalho, P.N. and Bester, K. (2020) Concentration dependent degradation  
82 of pharmaceuticals in WWTP effluent by biofilm reactors. *Water Research* 186, 116389. DOI:  
83 10.1016/j.watres.2020.116389.
- 84 van Bergen, T.J.H.M., Rios-Miguel, A.B., Nolte, T.M., Ragas, A.M.J., van Zelm, R., Graumans, M.,  
85 Scheepers, P.T.J., Jetten, M.S.M., Hendriks, A.J. and Welte, C.U. (2021) Do initial concentration and  
86 activated sludge seasonality affect pharmaceutical biotransformation rate constants? *Applied*  
87 *Microbiology and Biotechnology* 105(16), 6515-6527. DOI: 10.1007/s00253-021-11475-9.
- 88 Wang, Y., Fenner, K. and Helbling, D.E. (2020) Clustering micropollutants based on initial  
89 biotransformations for improved prediction of micropollutant removal during conventional activated  
90 sludge treatment. *Environmental Science: Water Research & Technology* 6(3), 554-565. DOI:  
91 10.1039/C9EW00838A.
- 92 Wei, Z., Li, W., Zhao, D., Seo, Y., Spinney, R., Dionysiou, D.D., Wang, Y., Zeng, W. and Xiao, R. (2019)  
93 Electrophilicity index as a critical indicator for the biodegradation of the pharmaceuticals in aerobic  
94 activated sludge processes. *Water research* 160, 10-17.
